# Supplementary material for: First-in-class immune-modulating small molecule Icaritin in advanced hepatocellular carcinoma: preliminary results of safety, durable survival and immune biomarkers
Source: PubMed Central journal article supplement (PMC6437929; doi:10.1186/s12885-019-5471-1), 2019-03-28
Supplement: 12885_2019_5471_MOESM1_ESM.pdf [file 12885_2019_5471_MOESM1_ESM.pdf]

**Fig. 1S**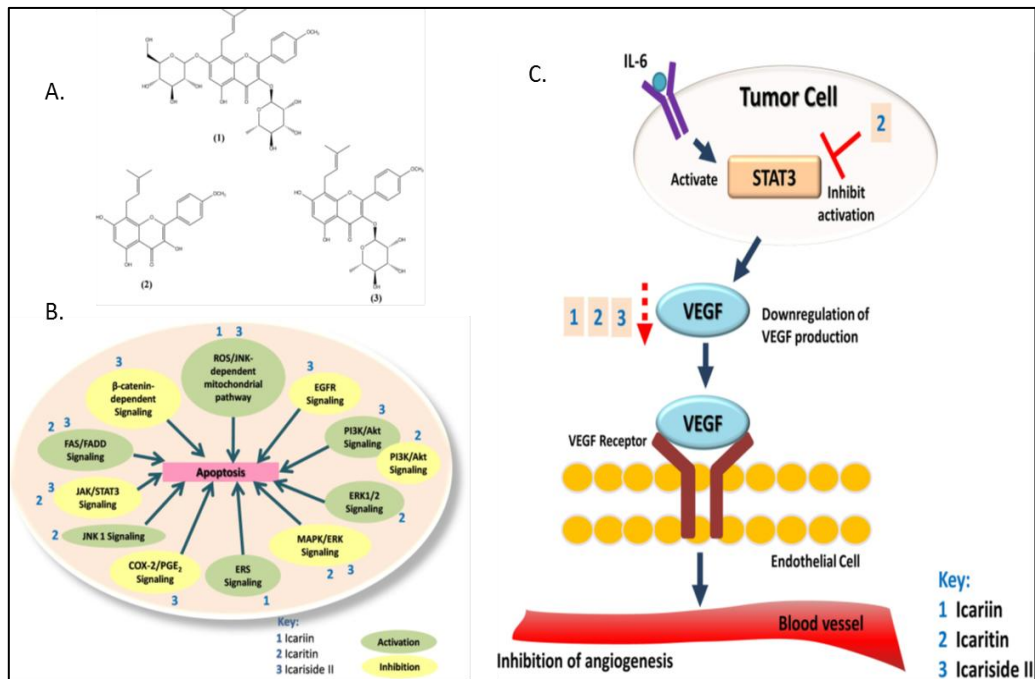

**Fig.1S.** Potential molecular basis of anti-cancer and immune-modulation targets/pathways associated with icaritin and its derivatives (modified from Tan HL et al. *Front Pharmacol.* 2016 Jun 29;7:191doi: 10.3389/fphar.2016.00191).

**A.** Chemical structures of icariin and its derivatives isolated from *Herba Epimedii*. Icaritin (1), icaritin (2), and icariside II (3).

**B.** Icaritin, icaritin, and icariside II exert apoptotic effects through multiple mechanisms, which include the inhibition of β-catenin-dependent signaling, EGFR signaling, MAPK/ERK signaling, PI3K/Akt signaling, JAK/STAT3 signaling, and COX-2/PGE<sub>2</sub> signaling.

**C.** Potential targets and pathways of anti-Inflammation and anti-angiogenic effect by icaritin and its derivatives.
