# Supplementary material for: First-in-class immune-modulating small molecule Icaritin in advanced hepatocellular carcinoma: preliminary results of safety, durable survival and immune biomarkers
Source: Springer Nature journal article supplement (doi:10.1186/s12885-019-5471-1), 2019-03-28
Supplement: 12885_2019_5471_MOESM8_ESM.pdf [file 12885_2019_5471_MOESM8_ESM.pdf]

| <b>Supplement Table 2. Baseline characteristics and survival of HCC patients</b> |                      |                    |                 |                      |                   |
|----------------------------------------------------------------------------------|----------------------|--------------------|-----------------|----------------------|-------------------|
| Characteristic                                                                   | Icaritin             |                    |                 | Oriental Trial       |                   |
|                                                                                  | 600 mg bid<br>(N=14) | 800mg bid<br>(N=6) | Total<br>(N=20) | Sorafenib<br>(N=150) | Placebo<br>(N=76) |
| Median age, years (range)                                                        | 61 (31-74)           | 43 (33-73)         | 58 (31-74)      | 51 (23–86)           | 52 (25–79)        |
| Male, no. (%)                                                                    | 12 (85.7)            | 5 (83.3)           | 17 (85.0)       | 127 (84.7)           | 66 (86.8)         |
| ECOG performance status, no. (%)                                                 |                      |                    |                 |                      |                   |
| 0                                                                                | 2 (14.3)             | 0 (0.0)            | 2 (10.0)        | 38 (25.3)            | 21 (27.6)         |
| 1                                                                                | 11 (78.6)            | 6 (100.0)          | 17 (85.0)       | 104 (69.3)           | 51 (67.1)         |
| 2                                                                                | 1 (7.1)              | 0 (0.0)            | 1 (5.0)         | 8 (5.3)              | 4 (5.3)           |
| Macroscopic vascular invasion, no. (%)                                           |                      |                    |                 |                      |                   |
| Yes                                                                              | 5 (35.7)             | 2 (33.3)           | 7 (35.0)        | 54 (36.0)            | 26 (34.2)         |
| No                                                                               | 9 (64.3)             | 4 (66.7)           | 13 (65.0)       | 96 (64.0)            | 50 (65.8)         |
| Portal vein tumor thrombus, no. (%)                                              |                      |                    |                 |                      |                   |
| Yes                                                                              | 3 (21.4)             | 2 (33.3)           | 5 (25.0)        | ---                  | ---               |
| No                                                                               | 11 (78.6)            | 4 (66.7)           | 15 (75.0)       | ---                  | ---               |
| Bulky tumor*, no. (%)                                                            |                      |                    |                 |                      |                   |
| Yes                                                                              | 1 (7.1)              | 1 (16.7)           | 2 (10.0)        | ---                  | ---               |
| No                                                                               | 13 (92.9)            | 5 (83.3)           | 18(90.0)        | ---                  | ---               |
| Extrahepatic metastasis, no. (%)                                                 |                      |                    |                 |                      |                   |
| Yes                                                                              | 13 (92.9)            | 5 (83.3)           | 18 (90.0)       | 103 (68.7)           | 52 (68.4)         |
| No                                                                               | 1 (7.1)              | 1 (16.7)           | 2 (10.0)        | 47 (31.3)            | 24 (31.6)         |
| Extrahepatic metastatic site, no. (%)                                            |                      |                    |                 |                      |                   |
| Lymph node                                                                       | 7 (50.0)             | 4 (66.7)           | 11 (55.0)       | 46 (30.7)            | 26 (34.2)         |
| Lung                                                                             | 7 (50.0)             | 3 (50.0)           | 10 (50.0)       | 78 (52.0)            | 34 (44.7)         |
| BCLC stage, no. (%)                                                              |                      |                    |                 |                      |                   |
| B                                                                                | 1 (7.1)              | 0 (0.0)            | 1 (5.0)         | ---                  | ---               |
| C                                                                                | 13 (92.9)            | 6 (100.0)          | 19 (95.0)       | 143 (95.3)           | 73 (96.1)         |
| Number of tumor sites, no. (%)                                                   |                      |                    |                 |                      |                   |
| 1                                                                                | 2 (14.3)             | 1 (16.7)           | 3 (15.0)        | 20 (13.3)            | 5 (6.6)           |
| 2                                                                                | 6 (42.9)             | 1 (16.7)           | 7 (35.0)        | 52 (34.7)            | 27 (35.5)         |
| 3                                                                                | 3 (21.4)             | 2 (33.3)           | 5 (25.0)        | 30 (20.0)            | 14 (18.4)         |
| ≥4                                                                               | 3 (21.4)             | 2 (33.3)           | 5 (25.0)        | 48 (32.0)            | 30 (39.5)         |
| Hepatitis virus status, no. (%)                                                  |                      |                    |                 |                      |                   |
| HBV infection                                                                    | 12(85.7)             | 6 (100.0)          | 18 (90.0)       | 106 (70.7)           | 59 (77.6)         |
| HCV infection                                                                    | 1 (7.1)              | 0 (0.0)            | 1 (5.0)         | 16 (10.7)            | 3 (3.9)           |
| Liver cirrhosis, no. (%)                                                         |                      |                    |                 |                      |                   |
| Yes                                                                              | 10 (71.4)            | 5 (83.3)           | 15 (75.0)       | ---                  | ---               |
| No                                                                               | 4 (28.6)             | 1 (16.7)           | 5 (25.0)        | ---                  | ---               |
| Child-Pugh classification, no. (%)                                               |                      |                    |                 |                      |                   |
| A                                                                                | 13 (92.9)            | 5 (83.3)           | 18 (90.0)       | 146 (97.3)           | 74 (97.4)         |

|                                 |           |           |           |            |           |
|---------------------------------|-----------|-----------|-----------|------------|-----------|
| <b>B</b>                        | 1 (7.1)   | 1 (16.7)  | 2 (10.0)  | 4 (2.7)    | 2 (2.6)   |
| AFP > ULN (laboratory), no. (%) | 13 (92.9) | 6 (100.0) | 19 (95.0) | 116 (77.3) | 59 (77.6) |
| Previous treatment, no. (%)     |           |           |           |            |           |
| Surgery                         | 3 (21.4)  | 4 (66.7)  | 7 (35.0)  | 49 (32.7)  | 21 (27.6) |
| TACE/RFA                        | 11 (78.6) | 3 (50.0)  | 14 (70.0) | 61 (40.7)  | 33 (43.4) |
| Sorafenib or Chemo              | 1 (7.1)   | 3 (50.0)  | 4 (20.0)  | 0          | 0         |
| Survival (Days)                 |           |           |           |            |           |
| Overall Survival (medium OS)    | 214       | 156.5     | 205       | 174*       | 114*      |
| PR/SD Patients (medium OS)      | 460       | 422       | 432       | ---        | ---       |
| PD Patients ((medium OS)        | 125.5     | 95        | 114       | ---        | ---       |

(\* Oriental trial HCC patient from China, Ref. European J. Cancer, 2012, 48: 1452)
