# Supplementary material for: First-in-class immune-modulating small molecule Icaritin in advanced hepatocellular carcinoma: preliminary results of safety, durable survival and immune biomarkers
Source: Springer Nature journal article supplement (doi:10.1186/s12885-019-5471-1), 2019-03-28
Supplement: MOESM6 [file 16582028]

| <b>Supplement Table 1.</b> Association between dosage and response |       |       |       |                       |       |        |
|--------------------------------------------------------------------|-------|-------|-------|-----------------------|-------|--------|
| Dosage                                                             | Group |       |       |                       |       | Total  |
|                                                                    | NE    | PD    | PD/NE | PR                    | SD    |        |
| 600 mg bid                                                         | 1     | 6     | 1     | 1                     | 5     | 14     |
|                                                                    | 5.00  | 30.00 | 5.00  | 5.00                  | 5.00  | 70.00  |
|                                                                    | 7.14  | 42.86 | 7.14  | 7.14                  | 35.71 |        |
|                                                                    | 50.00 | 75.00 | 33.33 | 100.00                | 83.33 |        |
| 800 mg bid                                                         | 1     | 2     | 2     | 0                     | 1     | 6      |
|                                                                    | 5     | 10    | 10    | 0                     | 5     | 30.00  |
|                                                                    | 16.67 | 33.33 | 33.33 | 0                     | 16.67 |        |
|                                                                    | 50    | 25    | 66.67 | 0                     | 16.67 |        |
| Total                                                              | 2     | 8     | 3     | 1                     | 6     | 20     |
|                                                                    | 10    | 40    | 15    | 5                     | 30    | 100.00 |
| Fisher's Exact Test                                                |       |       |       | Table probability (P) |       | 0.0260 |
|                                                                    |       |       |       | Pr <=P                |       | 0.5489 |

Abbreviations: PR: Partial Response; SD: Stable Disease; PD: Progression Disease; NE: Non-RECIST evaluation;
